# Supplementary material for: Synthesis of Some New Barbituric and Thiobarbituric Acids Bearing 1,2,4-Triazine Moiety and Their Related Systems as Herbicidal Agents
Source: Hindawi journal article supplement (doi:10.1155/2019/3035107), 2019-11-07
Supplement: f1 [file 3035107.f1.pdf]

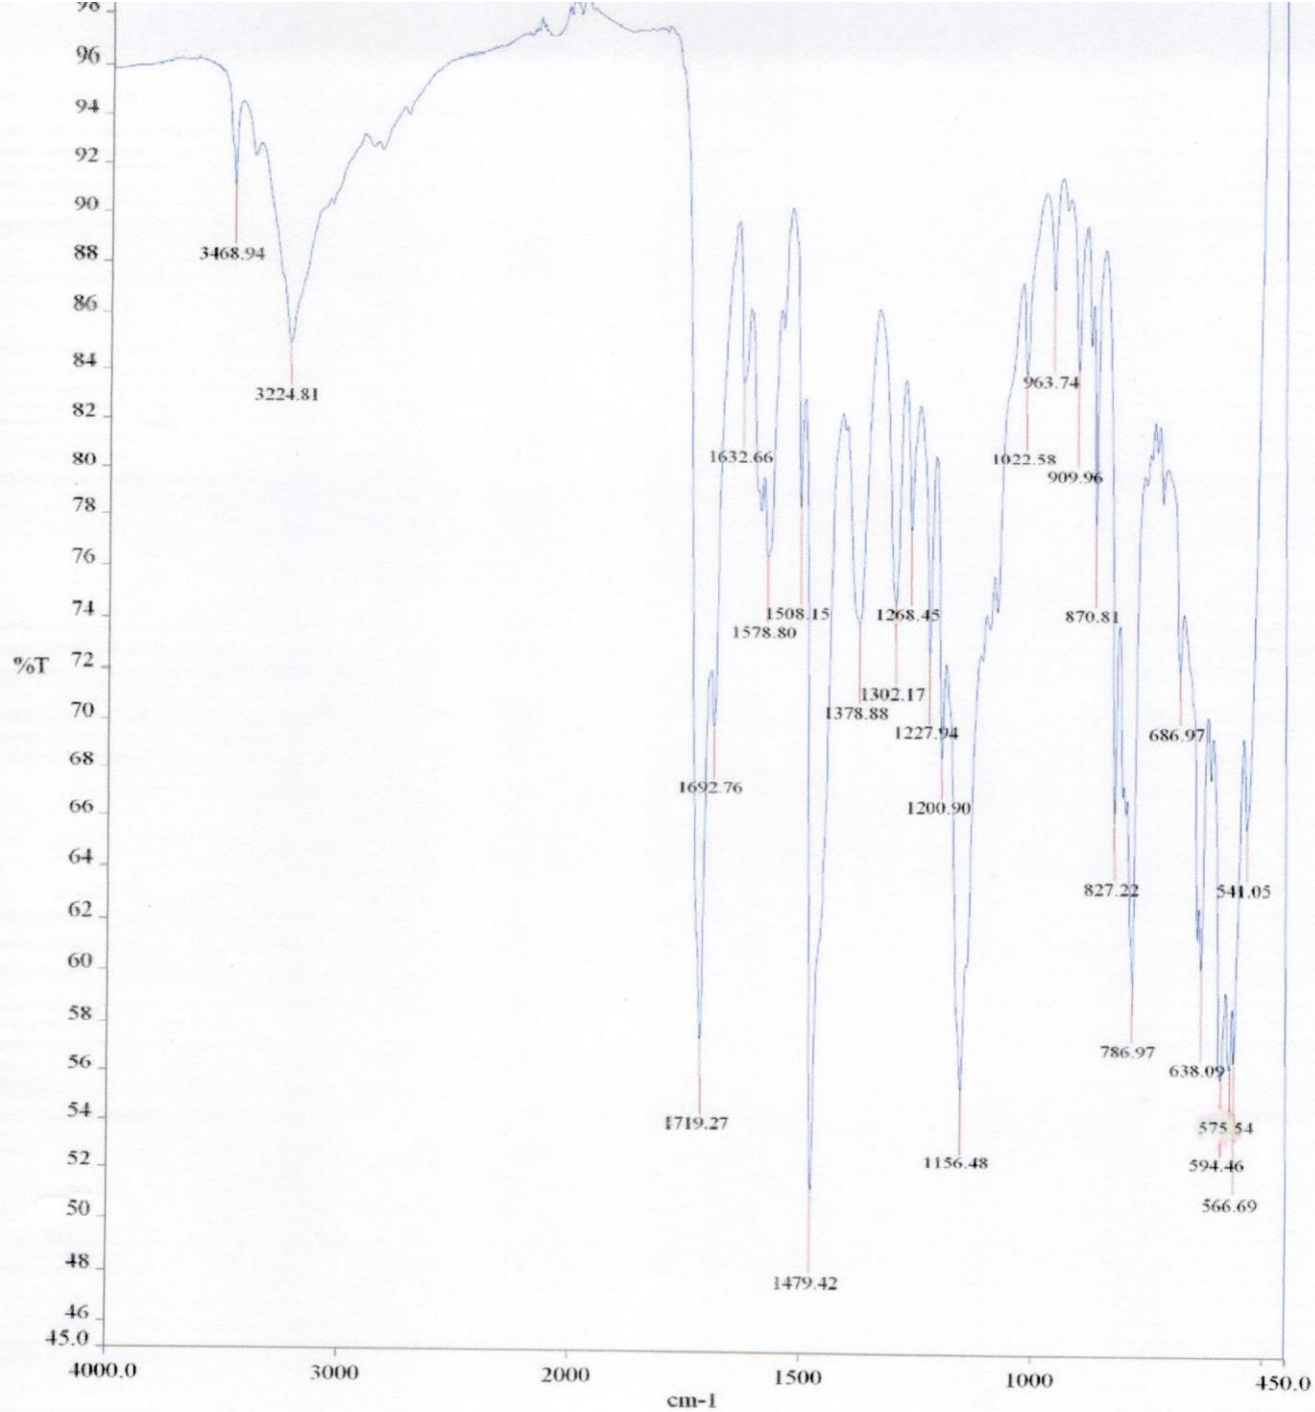

IR spectrum of compound

4

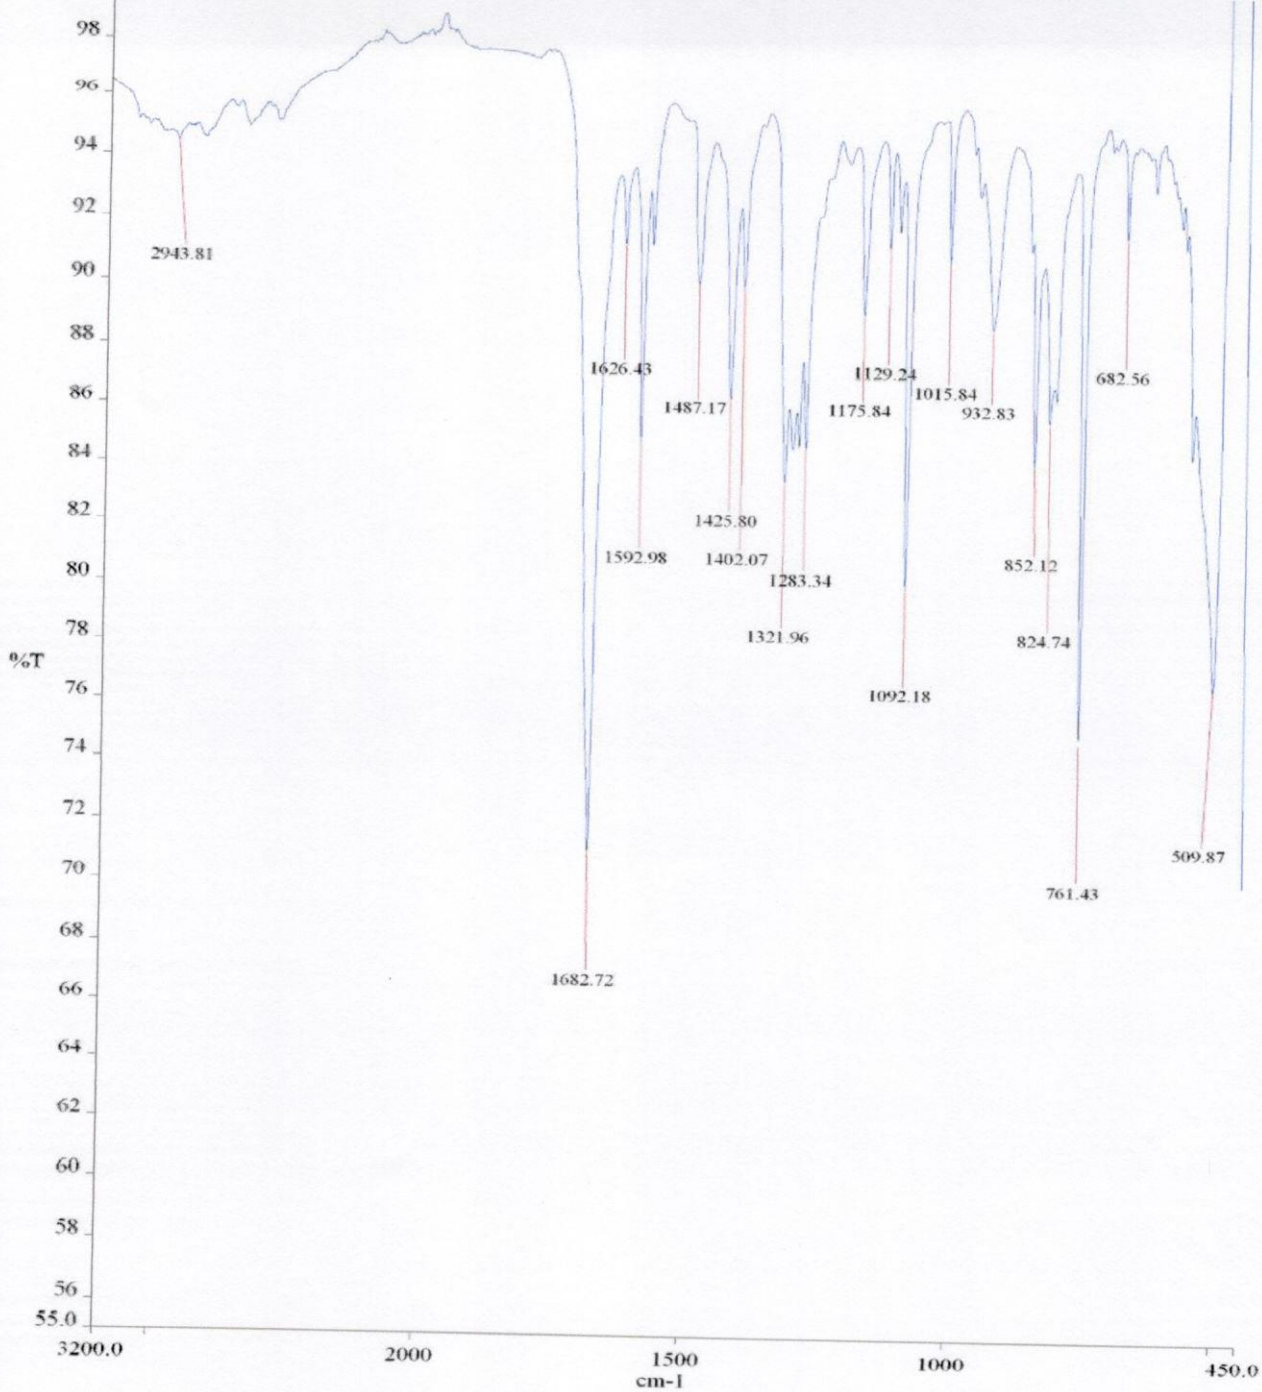

IR spectrum of compound

19

5

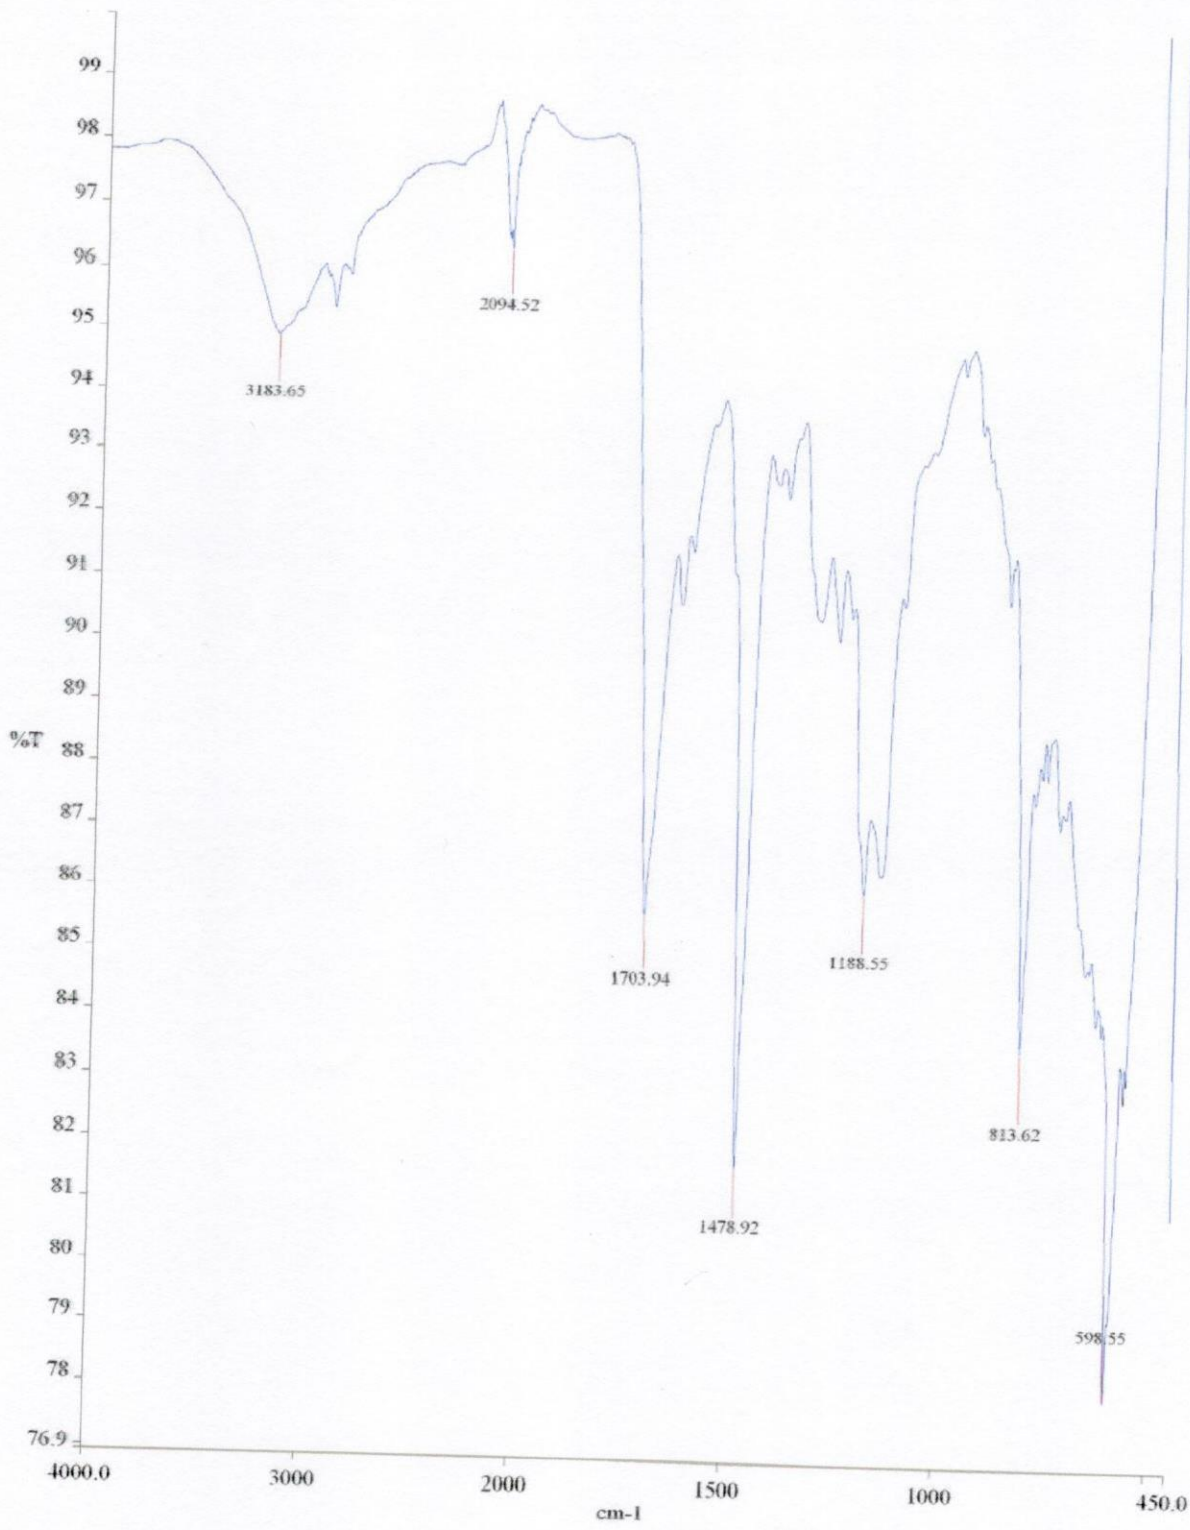

IR spectrum of compound :

8

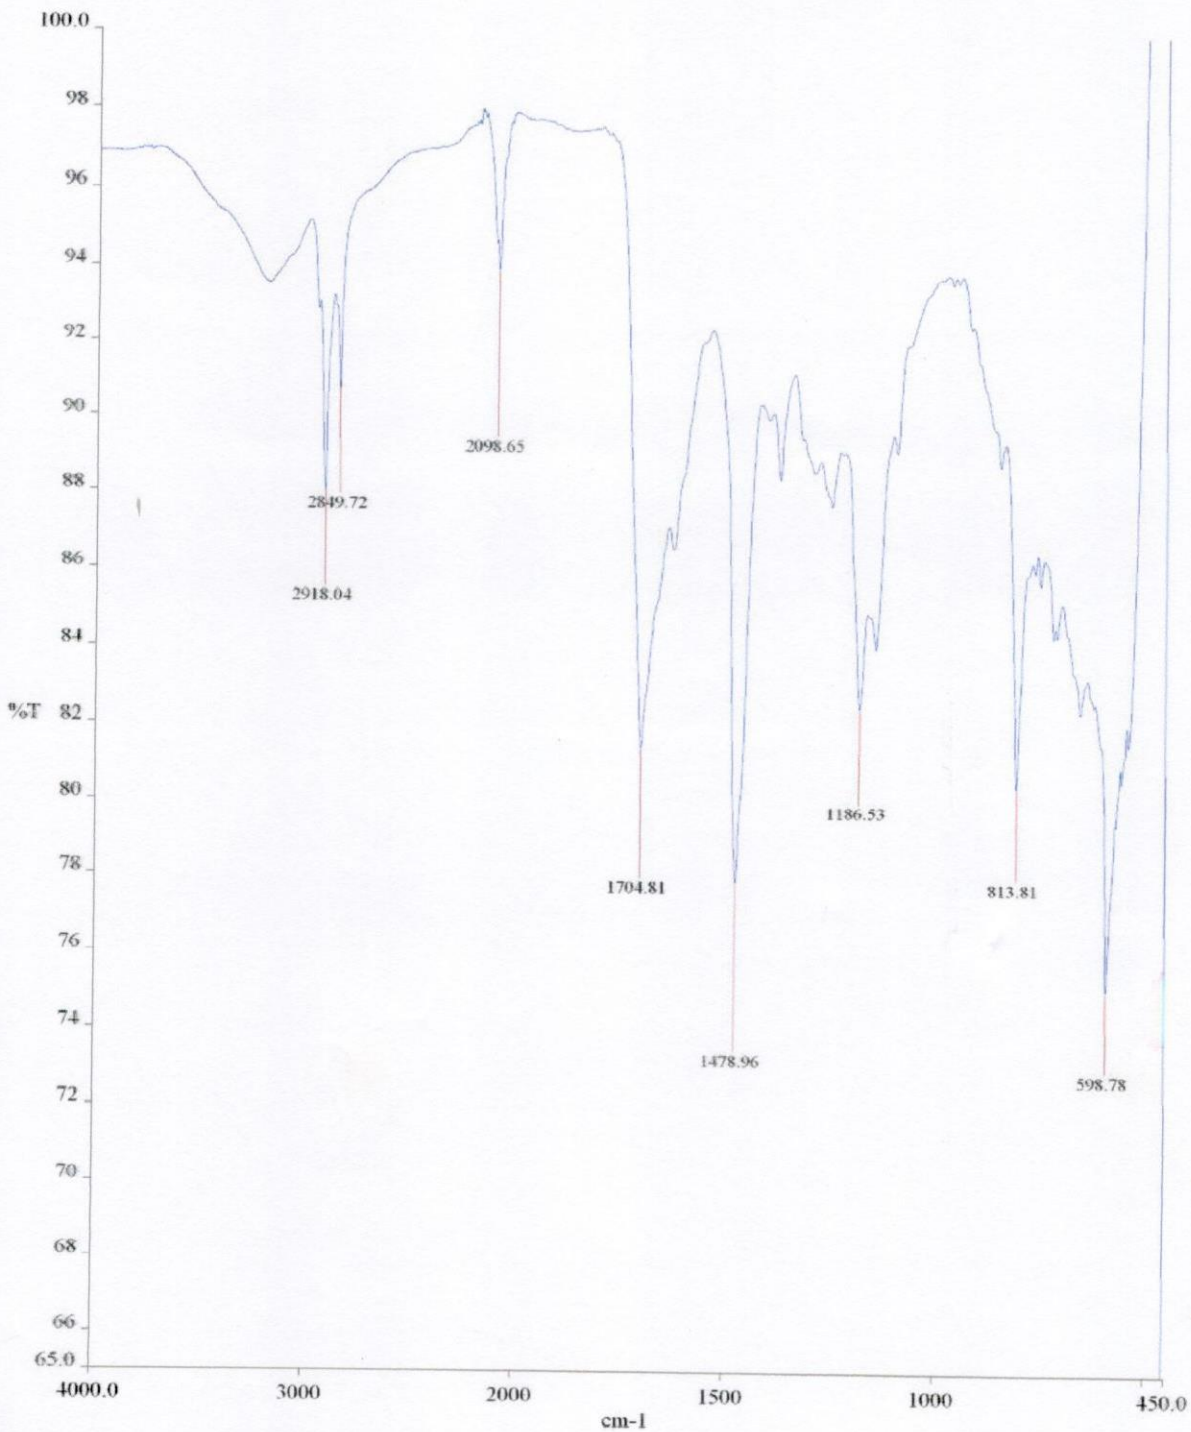

IR spectrum of compound 12

12

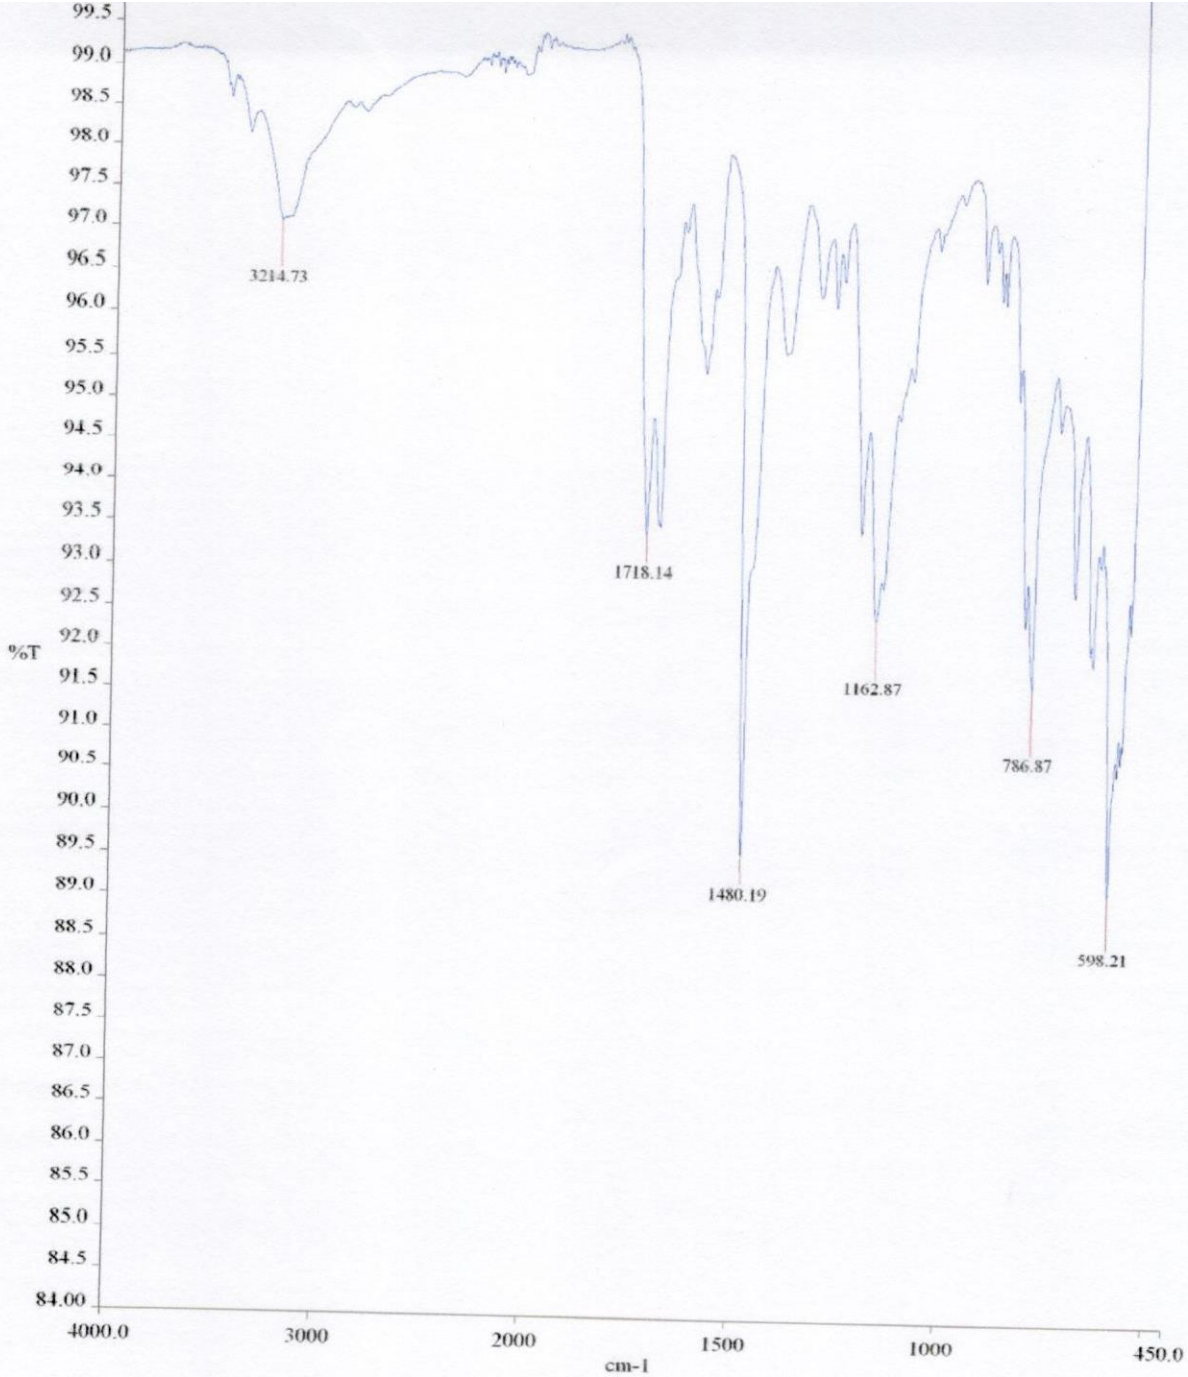

IR spectrum of compound

13
